# Supplementary material
Source: ML conference proceedings conference paper supplement (https://openaccess.thecvf.com/content/ICCV_2019/html/Zhou_Vision-Infused_Deep_Audio_ICCV_2019_paper.html)
Supplement: Supplementary file 1 [file Zhou_Vision-Infused_Deep_Audio_ICCV_2019_supplemental.pdf]

Archive with 2 entries (2 files):
- paper_754_supp.mp4
- README.txt
