# Supplementary material
Source: ML conference proceedings conference paper supplement (https://openaccess.thecvf.com/content/ICCV_2019/html/Zhou_Vision-Infused_Deep_Audio_ICCV_2019_paper.html)
Supplement: Supplementary file 1 [file Zhou_Vision-Infused_Deep_Audio_ICCV_2019_supplemental.pdf › README.txt]

The zip file includes an MP4 video which is encoded using H.264 (the codec can be downloaded at http://www.divx.com/en/software/technologies/h264)
